# Supplementary material for: Crystal structure, optical characterization, conduction and relaxation mechanisms of a new hybrid compound (C 6 H 9 N 2 ) 2 [Sb 2 Cl 8 ]
Source: Royal Society of Chemistry journal article supplement (doi:10.1039/d3ra08885e), 2024-01-01
Supplement: d3ra08885e1.pdf [file d3ra08885e1.pdf]

## Electronic Supplementary Information

### Crystal structure, optical characterization, conduction and relaxation mechanisms in the new hybrid compound $(C_6H_9N_2)_2[Sb_2Cl_8]$

I. Chaabane<sup>1</sup>, W. Rekik<sup>2</sup>, H. Ghalla<sup>3</sup>, M. Zaghrioui<sup>4</sup>, J. Lhoste<sup>5</sup>, A. Oueslati<sup>1</sup>

<sup>1</sup>Laboratory of spectroscopic characterization and optical materials, Faculty of Sciences, University of Sfax, B.P. 1171, 3000 Sfax, Tunisia

<sup>2</sup>Laboratory Physical-Chemistry of Solid state, Chemistry department, Faculty of Sciences of Sfax, University of Sfax, BP 1171, 3000, Sfax, Tunisia

<sup>3</sup>Quantum and Statistical Physics Laboratory, Faculty of Sciences, University of Monastir, Monastir 5079, Tunisia

<sup>4</sup>Université de Tours, Laboratoire GREMAN UMR-CNRS 7347, 15 rue de la Chocolaterie, IUT de Blois, 41029 Blois cedex, France

<sup>5</sup>Institut des Molécules et Matériaux du Mans (IMMM), UMR-6283 CNRS, Le Mans Université, Avenue Olivier Messiaen, 72085 Le Mans Cedex 9, France

\* Corresponding author. E-mail address: [oeslatiabderrazek@yahoo.fr](mailto:oeslatiabderrazek@yahoo.fr)

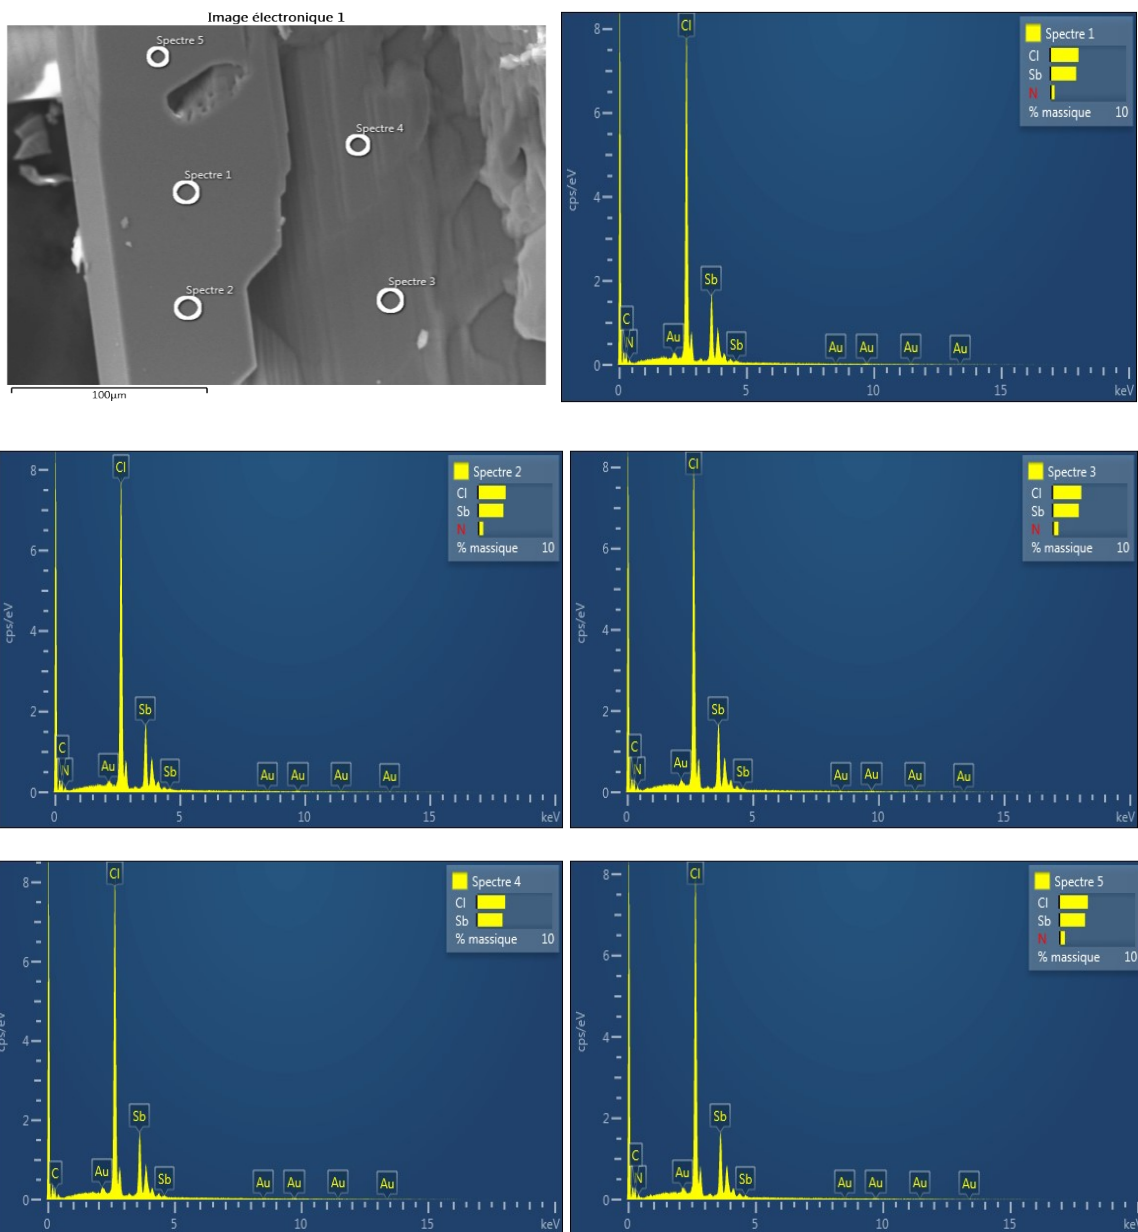

**Figure S1:** EDS profile of  $(C_6H_9N_2)_2[Sb_2Cl_8]$  crystals for different crystals.

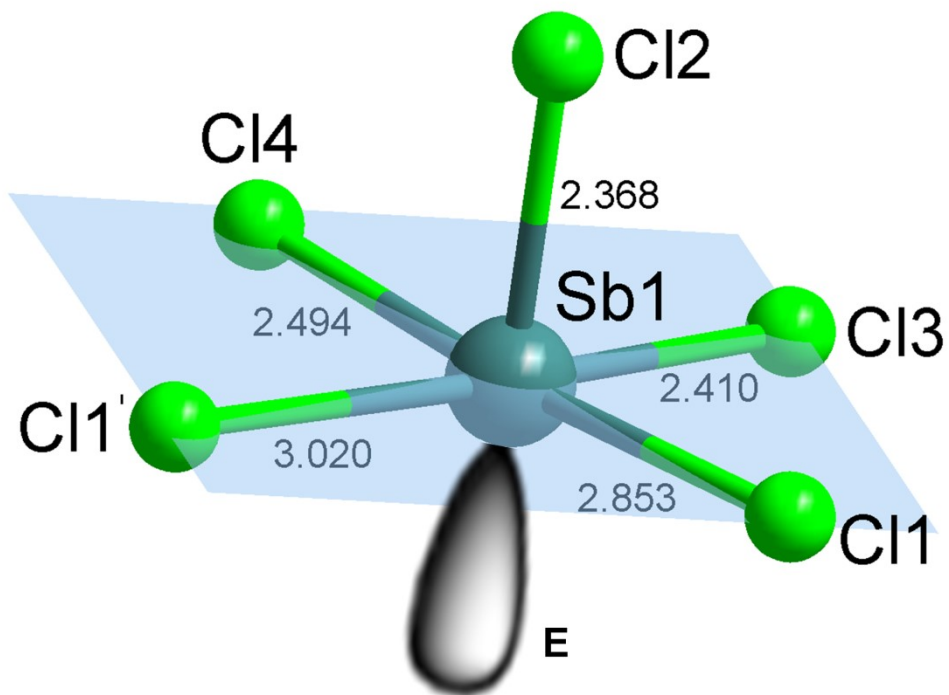

**Figure S2:** The coordination sphere around antimony atom in  $(C_6H_9N_2)_2[Sb_2Cl_8]$  (symmetry code:  $^1 1-x, -y, -z$ ).

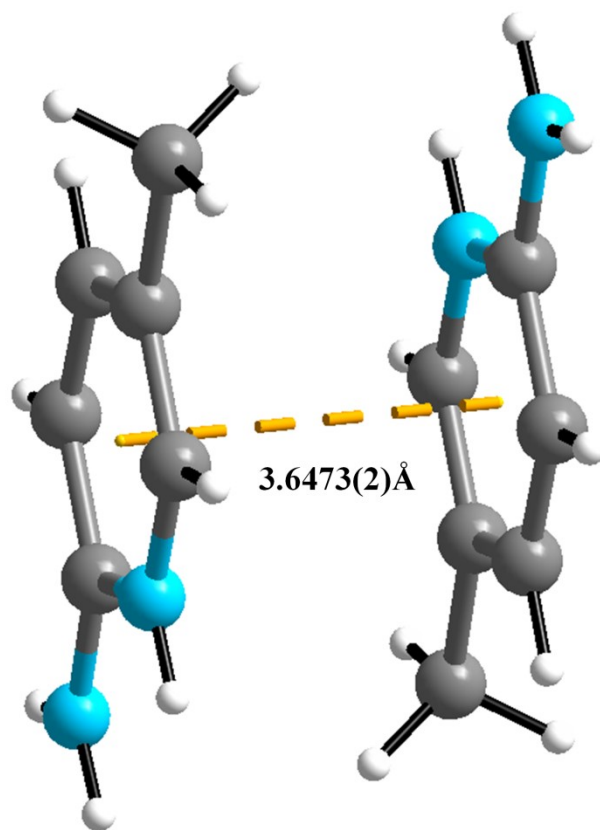

**Figure S3:**  $\pi$ - $\pi$  interactions in the structure of  $(\text{C}_6\text{H}_9\text{N}_2)_2[\text{Sb}_2\text{Cl}_8]$

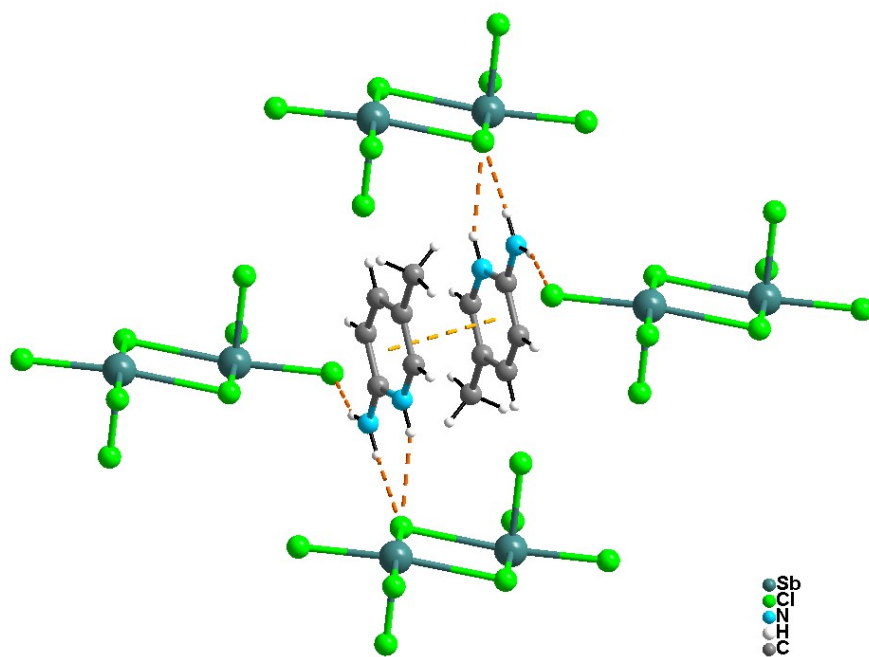

**Figure S4:** Hydrogen bonds established by the protonated amines

**Table S1:** Selected bond distances and angles (bond length in Å, bond angle in degrees).

| Bond lengths (Å)                                             |           | Angle (°)                |             |
|--------------------------------------------------------------|-----------|--------------------------|-------------|
| [Sb <sub>2</sub> Cl <sub>8</sub> ] <sup>2-</sup>             |           |                          |             |
| Sb1-Cl1                                                      | 2.8527(8) | Cl1-Sb1-Cl2              | 84.39(3)    |
| Sb1-Cl2                                                      | 2.3677(8) | Cl1-Sb1-Cl3              | 89.81(3)    |
| Sb1-Cl3                                                      | 2.4097(8) | Cl1-Sb1-Cl4              | 172.89(3)   |
| Sb1-Cl4                                                      | 2.4942(8) | Cl1-Sb1-Cl1 <sup>I</sup> | 88.001(22)  |
| Sb1-Cl1 <sup>I</sup>                                         | 3.0196(9) | Cl2-Sb1-Cl3              | 92.69(3)    |
|                                                              |           | Cl2-Sb1-Cl4              | 88.93(3)    |
|                                                              |           | Cl2-Sb1-Cl1 <sup>I</sup> | 84.247(25)  |
|                                                              |           | Cl3-Sb1-Cl4              | 92.95(3)    |
|                                                              |           | Cl3-Sb1-Cl1 <sup>I</sup> | 176.395(23) |
|                                                              |           | Cl4-Sb1-Cl1 <sup>I</sup> | 88.913(25)  |
| [C <sub>6</sub> H <sub>9</sub> N <sub>2</sub> ] <sup>+</sup> |           |                          |             |
| N1-C5                                                        | 1.337(3)  | C5-N1-C6                 | 123.3(2)    |
| N1-C6                                                        | 1.354(4)  | C1-C2-C3                 | 122.2(3)    |
| N2-C5                                                        | 1.332(4)  | C1-C2-C6                 | 122.2(3)    |
| C1-C2                                                        | 1.501(4)  | C3-C2-C6                 | 116.1(3)    |
| C2-C3                                                        | 1.397(4)  | C2-C3-C4                 | 122.5(3)    |
| C2-C6                                                        | 1.352(4)  | C3-C4-C5                 | 119.5(3)    |
| C3-C4                                                        | 1.355(4)  | N1-C5-N2                 | 119.0(3)    |
| C4-C5                                                        | 1.399(4)  | N1-C5-C4                 | 117.1(3)    |
|                                                              |           | N2-C5-C4                 | 123.8(3)    |
|                                                              |           | N1-C6-C2                 | 121.5(3)    |
| Symmetry code: <sup>I</sup> 1-x, -y, -z                      |           |                          |             |

**Table S2:** Hydrogen bonding geometry (Å, °) in (C<sub>6</sub>H<sub>9</sub>N<sub>2</sub>)<sub>2</sub>[Sb<sub>2</sub>Cl<sub>8</sub>].

| <i>D—H</i> ⋯ <i>A</i>   | <i>D—H</i> | <i>H</i> ⋯ <i>A</i> | <i>D</i> ⋯ <i>A</i> | <i>D—H</i> ⋯ <i>A</i> |
|-------------------------|------------|---------------------|---------------------|-----------------------|
| N1-H1⋯C11               | 0.86       | 2.44                | 3.246(2)            | 156.3                 |
| N2-H2A⋯C11              | 0.86       | 2.65                | 3.402(3)            | 146.9                 |
| N2-H2B⋯C14 <sup>l</sup> | 0.86       | 2.66                | 3.487(3)            | 162.6                 |

Symmetry code: <sup>l</sup> x-1, y, z

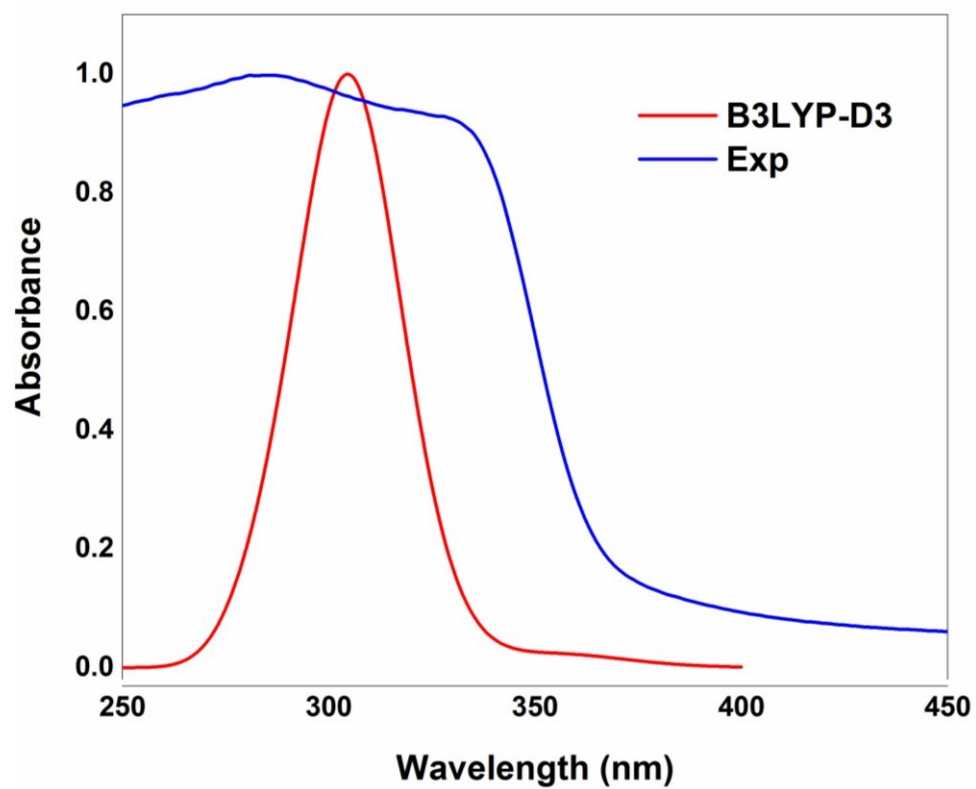

**Figure S5:** Absorption spectrum predicted with TD-B3LYP-D3/LanL2DZ method in HCl solvent, superimposed to the experimental spectrum.



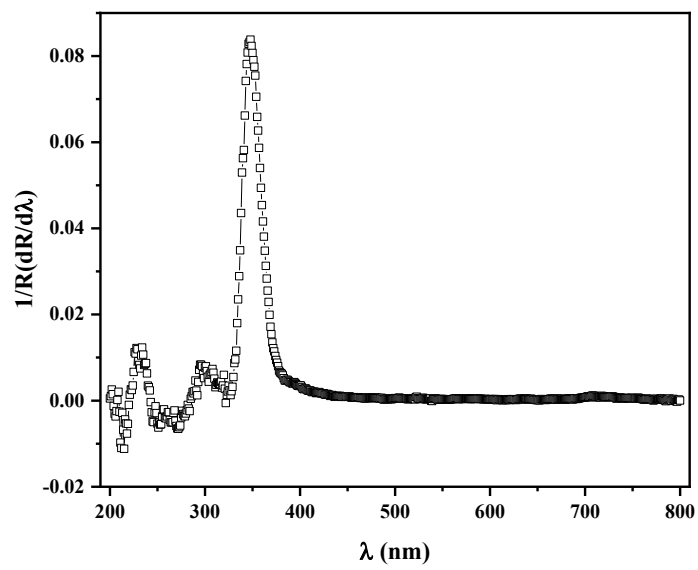

**Figure S6:** Variation of  $(1/R)(dR/d\lambda)$  as a function of wavelength.

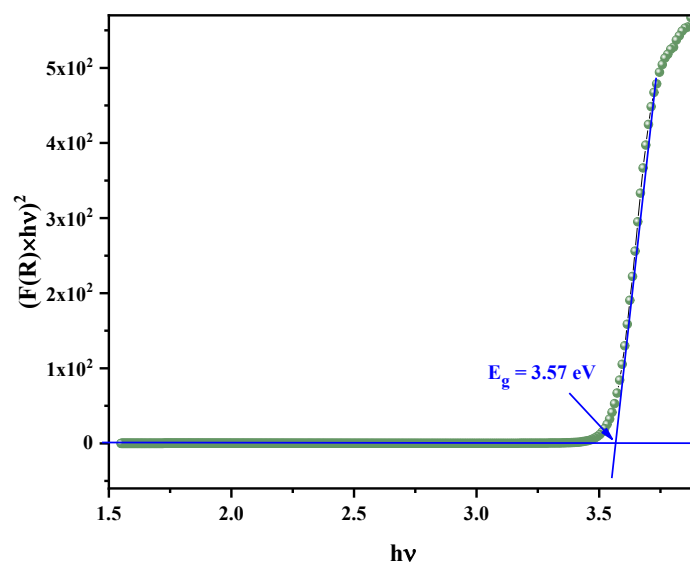

**Figure S7:** Tauc plot of  $(C_6H_9N_2)_2[Sb_2Cl_8]$  compound.

**Table S3:** Absorption wavelength ( $\lambda$ ), excitation energy (E), and oscillator strength ( $f$ ) along with the percentage of the major contribution of each electronic transition calculated by using the TD-B3LYP/LanL2DZ method in HCl solvent.

| No | E (cm <sup>-1</sup> ) | $\lambda$ (nm) | f (a.u) | Major contributions                     |
|----|-----------------------|----------------|---------|-----------------------------------------|
| 1  | 3.38                  | 356            | 0.0009  | HOMO→LUMO (97%)                         |
| 2  | 3.40                  | 353            | 0.0001  | HOMO→LUMO+1 (97%)                       |
| 3  | 3.91                  | 307            | 0.019   | HOMO-1→LUMO (86%) ; HOMO-1→LUMO+1 (11%) |
| 4  | 3.94                  | 304            | 0.0227  | HOMO-1→LUMO (10%) ; HOMO-1→LUMO+1 (87%) |
| 5  | 4.15                  | 289            | 0.0028  | HOMO-2→LUMO (66%) ; HOMO-2→LUMO+1 (30%) |
| 6  | 4.17                  | 287            | 0.0059  | HOMO-2→LUMO (27%) ; HOMO-2→LUMO+1 (63%) |

**Table S4:** TD–DFT calculations of HOMO-LUMO energy gap, chemical potential ( $\mu$ ), electronegativity ( $\chi$ ), global hardness ( $\eta$ ), global softness ( $\zeta$ ), electrophilicity index ( $\omega$ ).

| <b>Parameters</b>                              | <b>Value</b> |
|------------------------------------------------|--------------|
| $E_{\text{HOMO}}$ (eV)                         | -6.71        |
| $E_{\text{LUMO}}$ (eV)                         | -2.67        |
| $\Delta E_{\text{HOMO-LUMO gap}}$ (eV)         | 4.04         |
| Global Electrophilicity index $\omega$ (eV)    | 11.00        |
| Electronegativity $\chi$ (eV)                  | 4.69         |
| Chemical potential ( $\mu$ )                   | -4.69        |
| Global hardness ( $\eta$ ) (eV)                | 2.02         |
| Global softness ( $\zeta$ ) (eV) <sup>-1</sup> | 1.00         |
